# Supplementary material for: Influence of the Charge Ratio of Guanine-Quadruplex Structure-Based CpG Oligodeoxynucleotides and Cationic DOTAP Liposomes on Cytokine Induction Profiles
Source: MDPI journal article supplement (doi:10.3390/biom13111639), 2023-11-11
Supplement: s1 [file s1]

## Supporting Information

# Influence of the Charge Ratio of Guanine-Quadruplex Structure-Based CpG Oligodeoxynucleotides and Cationic DOTAP Liposomes on Cytokine Induction Profiles

Nguyen Bui Thao Le <sup>1,2</sup>, Anh Thi Tram Tu <sup>1,3,4</sup>, Dandan Zhao <sup>1</sup>, Chiaki Yoshikawa <sup>1,2</sup>, Kohsaku Kawakami<sup>1</sup>, Yoshihisa Kaizuka<sup>1</sup>, Tomohiko Yamazaki <sup>1,2\*</sup>

<sup>1</sup> Research Center for Macromolecules and Biomaterials, National Institute for Materials Science (NIMS), 1-2-1 Sengen, Tsukuba 305-0047, Japan;

le.buithaonguyen@nims.go.jp (N.B.T.L.); tuthitramanh@gmail.com (A.T.T.T.);

amberdiary@gmail.com (D.Z.); yoshikawa.chiaki@nims.go.jp (C.Y.);

kawakami.kohsaku@nims.go.jp (K.K.); kaizuka.yoshihisa@nims.go.jp (Y.K.)

<sup>2</sup> Division of Life Science, Hokkaido University, Kita 10, Nishi 8, Kita-ku, Sapporo 060-0808, Japan

<sup>3</sup> Department of Magnetic and Biomedical Materials, Faculty of Materials Science and Technology, VNUHCM-University of Science, 227 Nguyen Van Cu street, Ward 4, District 5, Ho Chi Minh City 70000, Vietnam

<sup>4</sup> Ho Chi Minh City Campus, Vietnam National University, Linh Trung, Thu Duc, Ho Chi Minh City 70000, Vietnam

\* Correspondence: yamazaki.tomohiko@nims.go.jp; Tel.: +81-29-859-2345; Fax: +81-29-859-2449

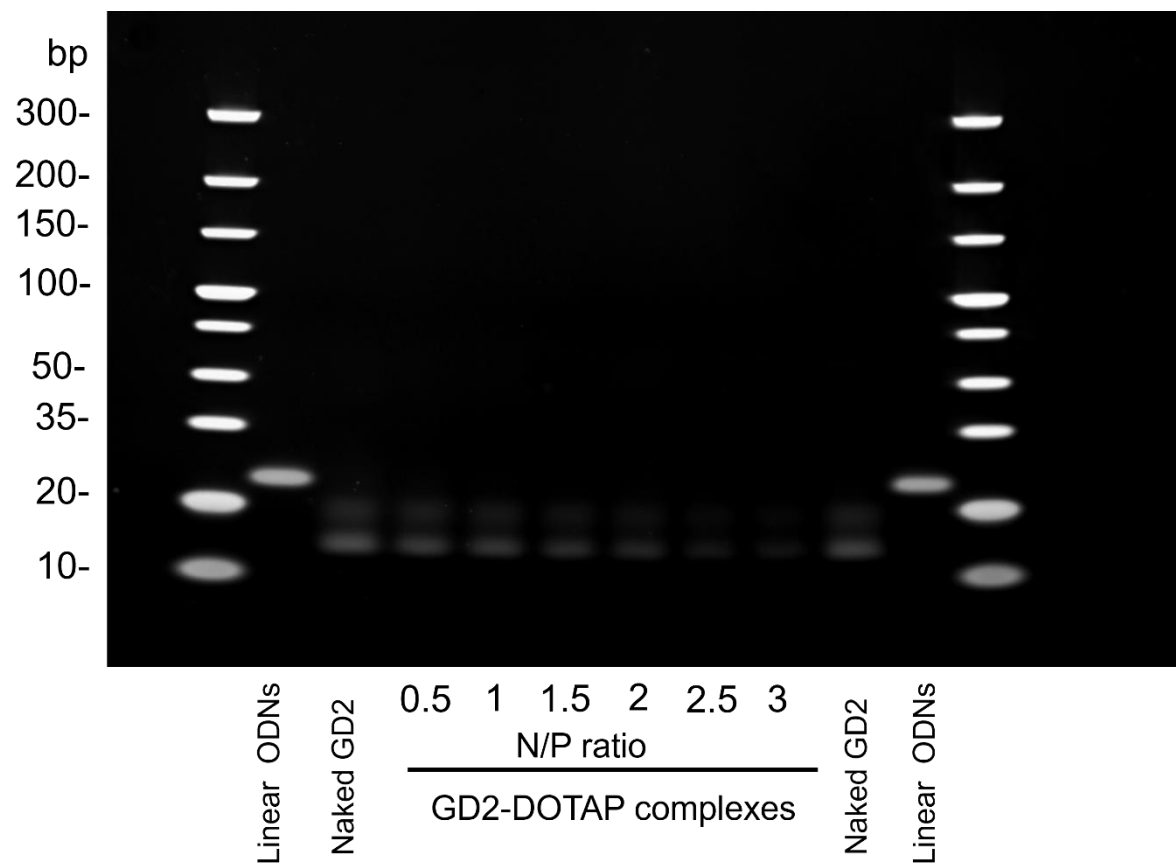

**Figure S1.** Polyacrylamide gel electrophoresis analysis of G4-CpG ODNs in complex with DOTAP. Electrophoresis was performed using a 10–20% linear gradient polyacrylamide gel in tris-glycine buffer supplemented with 4 mM KCl. Linear ODN is the ssODN with the same length (30mer) as GD2.

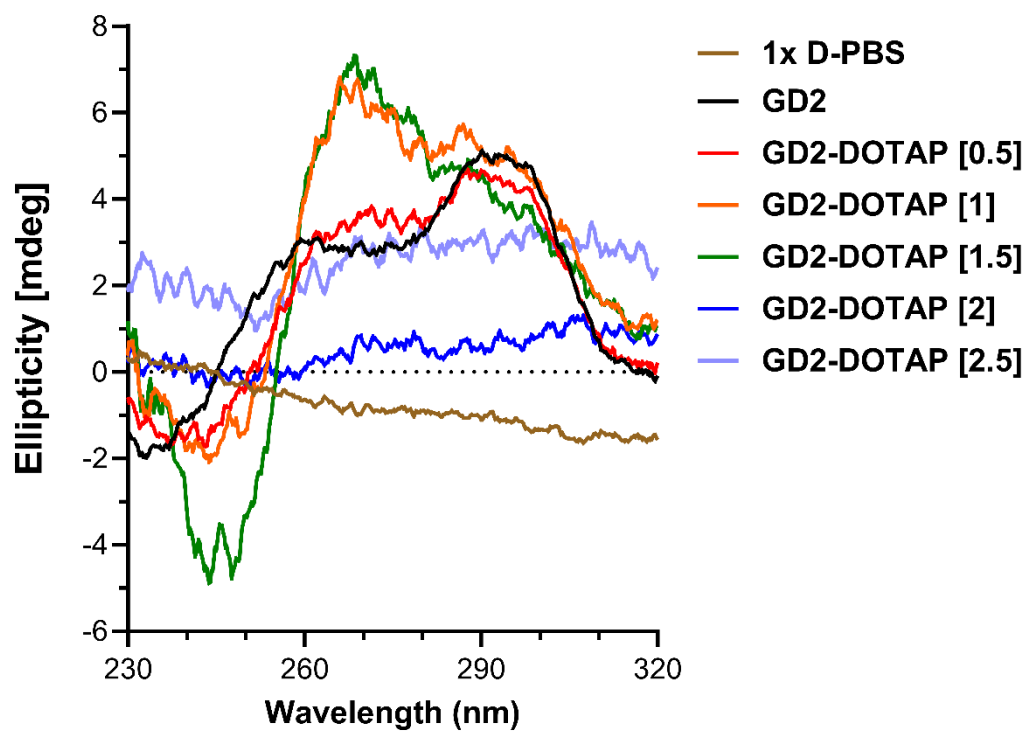

**Figure S2.** CD spectra of naked GD2 and GD2-DOTAP complexes were drawn from the original raw data.

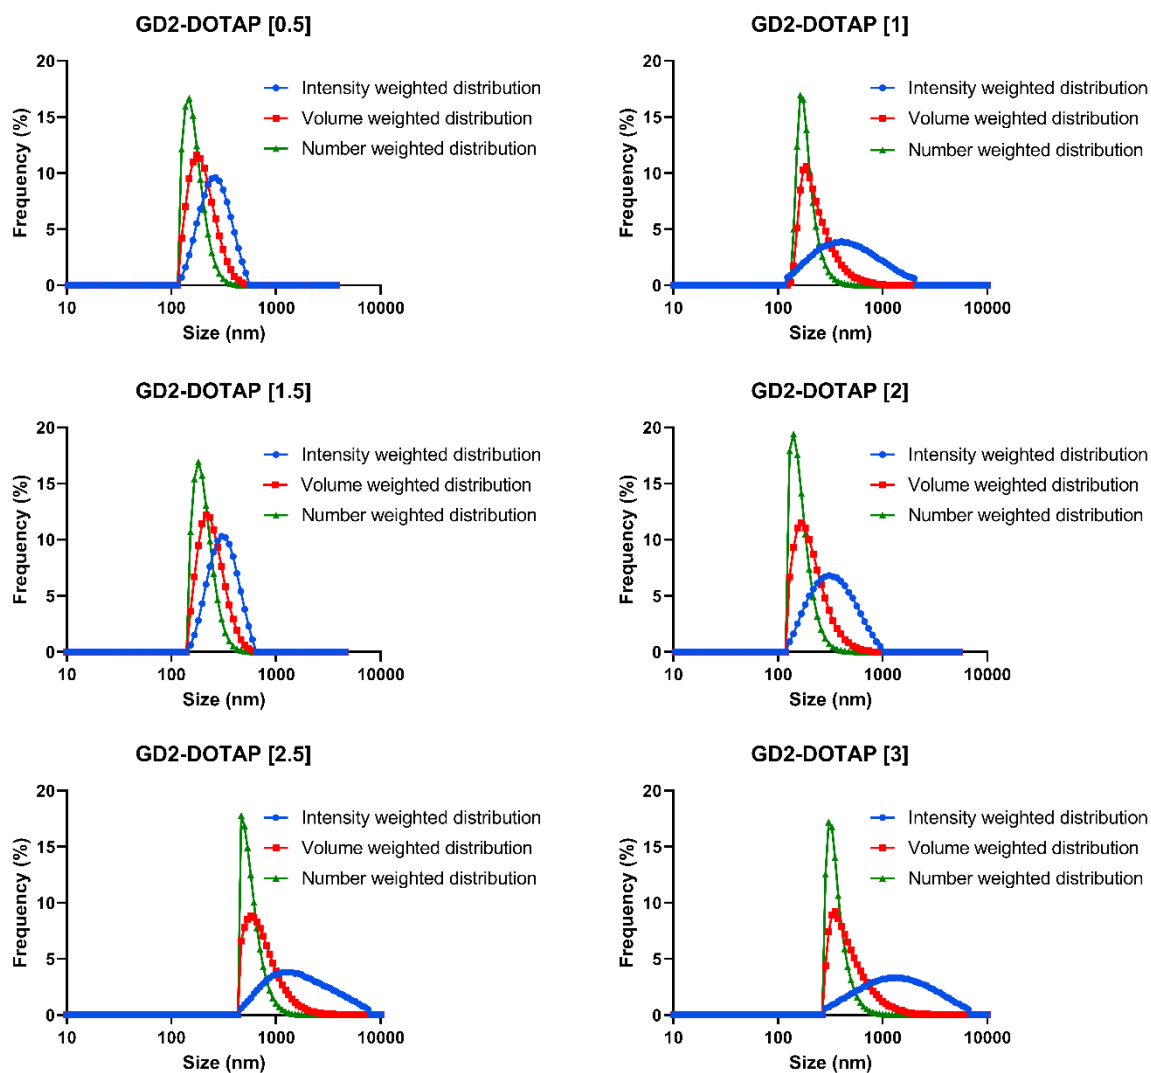

**Figure S3.** Intensity-, volume-, and number-weighted particle size distributions of GD2-DOTAP at various charge ratios. Distribution was calculated using the CONTIN algorithm.

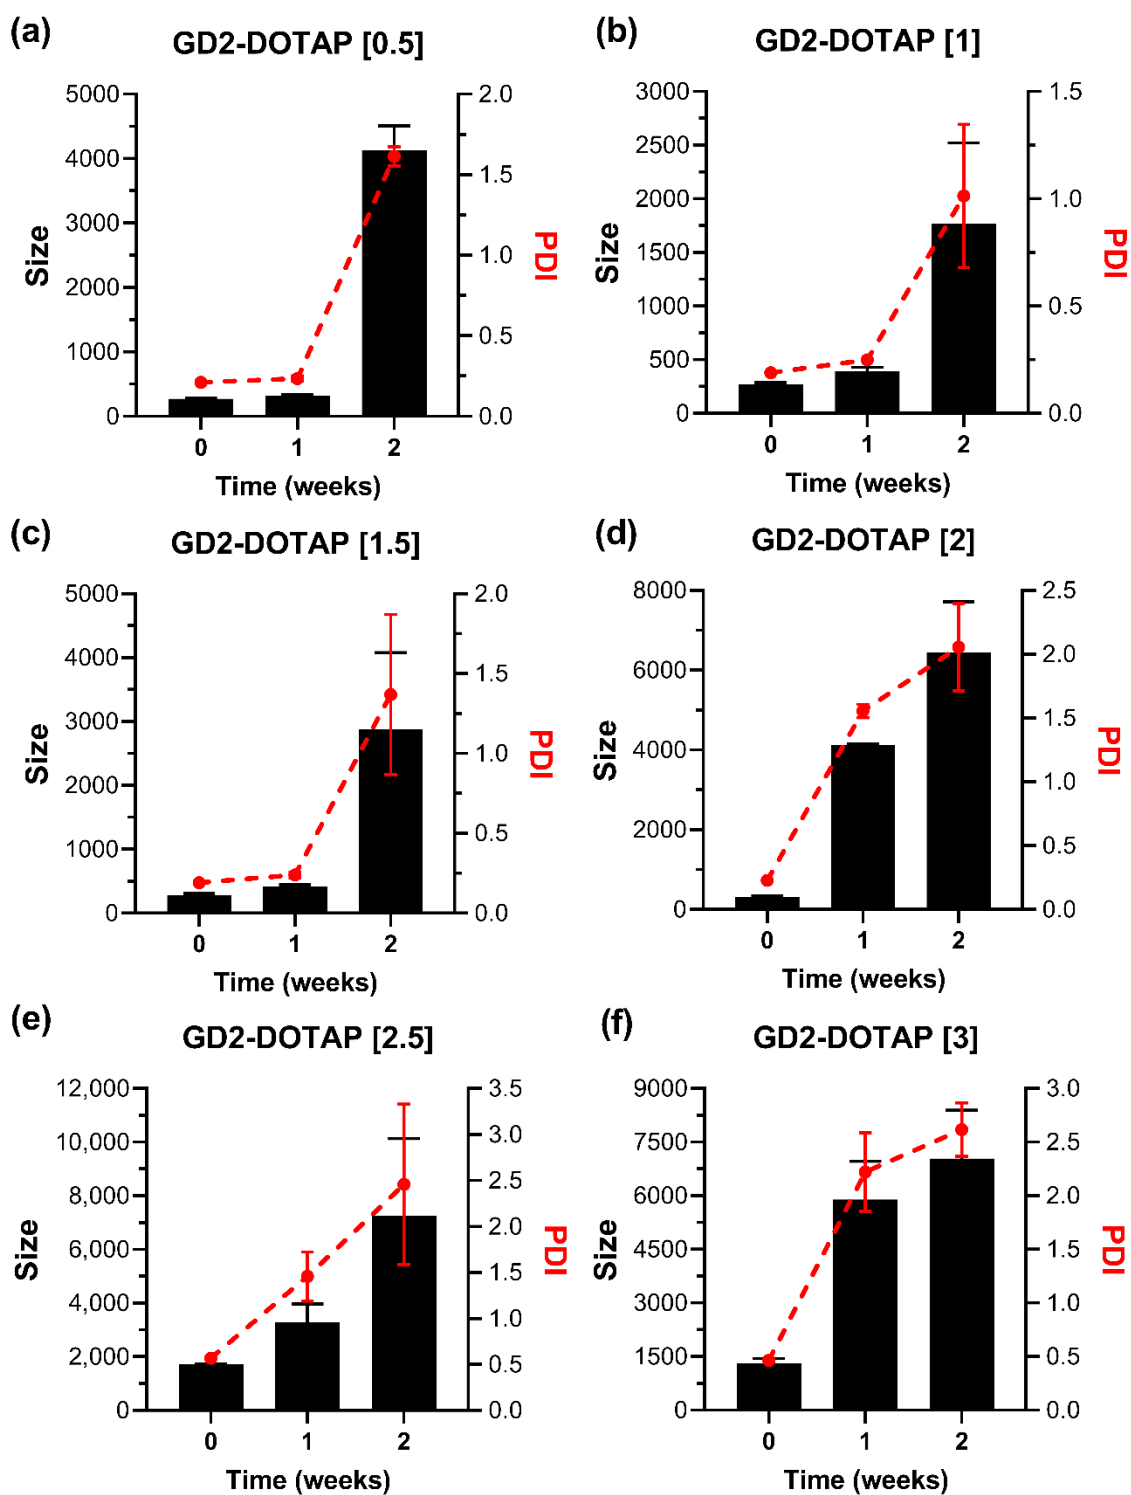

**Figure S4.** Hydrodynamic size (nm) reported as a function of time for all complexes at different charge ratios. Data are presented as mean  $\pm$  SD ( $n=3$ ).

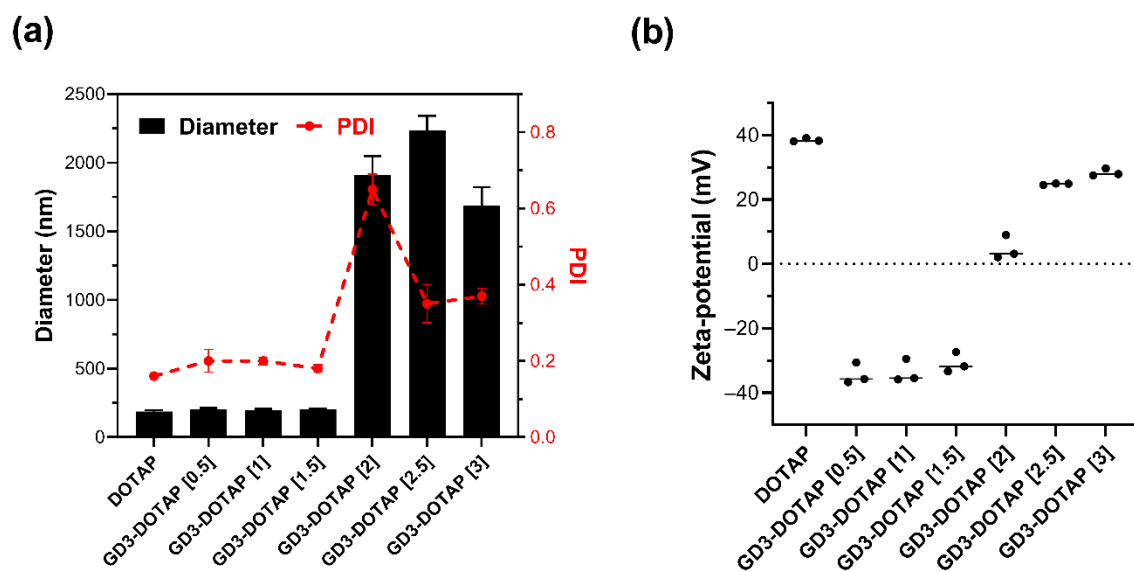

**Figure S5.** (a) Hydrodynamic size, polydispersity index, and (b) zeta potential of GD3-DOTAP complexes. Data are presented as mean  $\pm$  SD ( $n=3$ ).

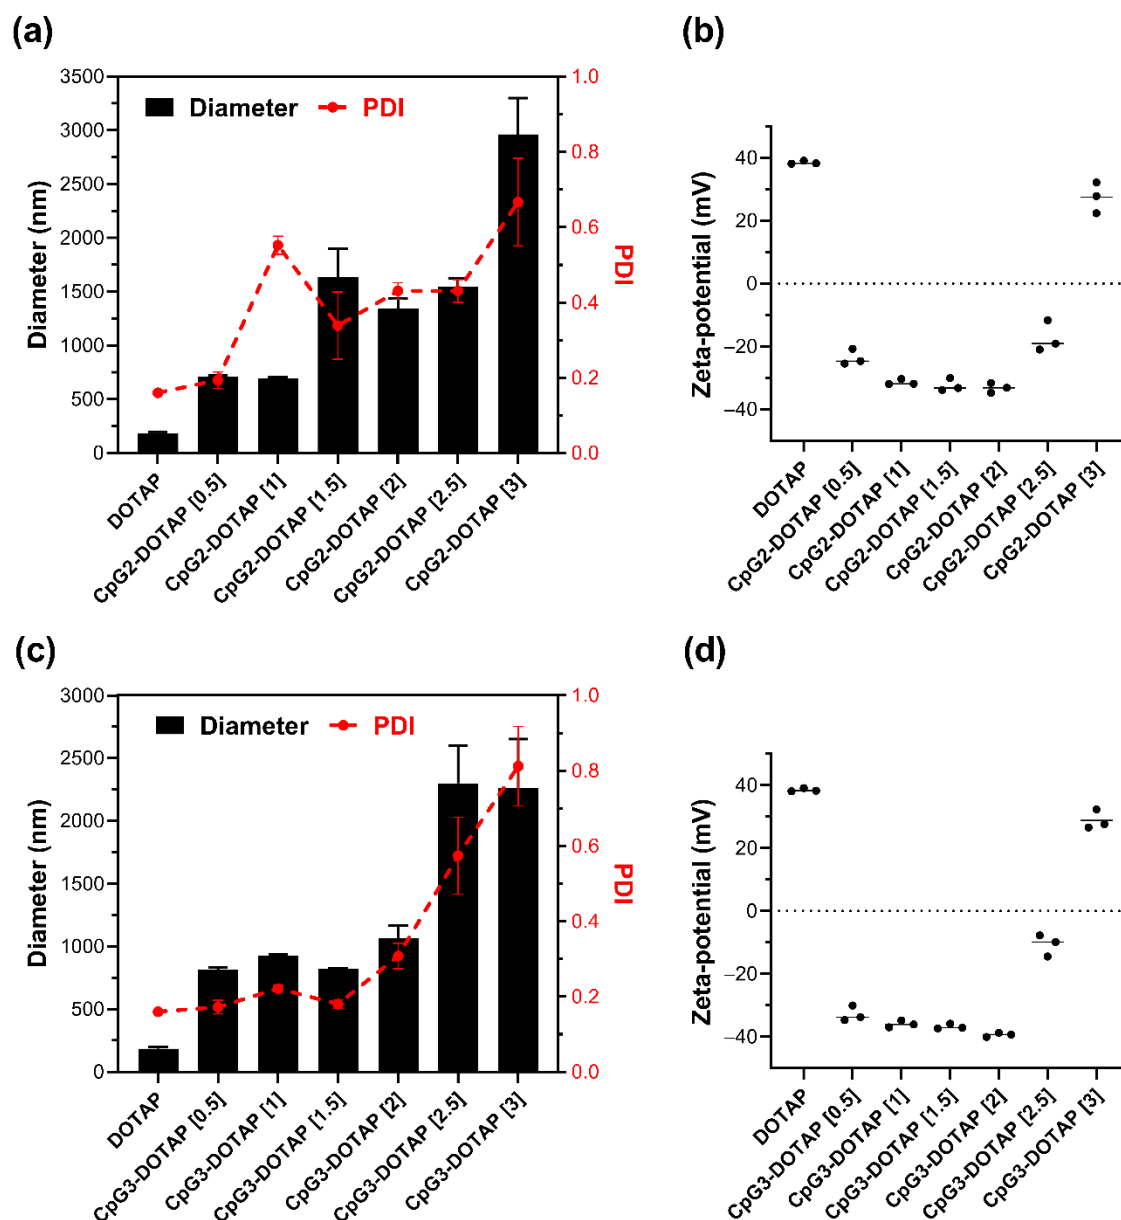

**Figure S6.** Characterization of linear CpG ODN-DOTAP liposome complexes of different charge ratios. (a, c) Hydrodynamic size, polydispersity index, and (b, d) Zeta potential. Data are presented as mean  $\pm$  SD ( $n=3$ ).

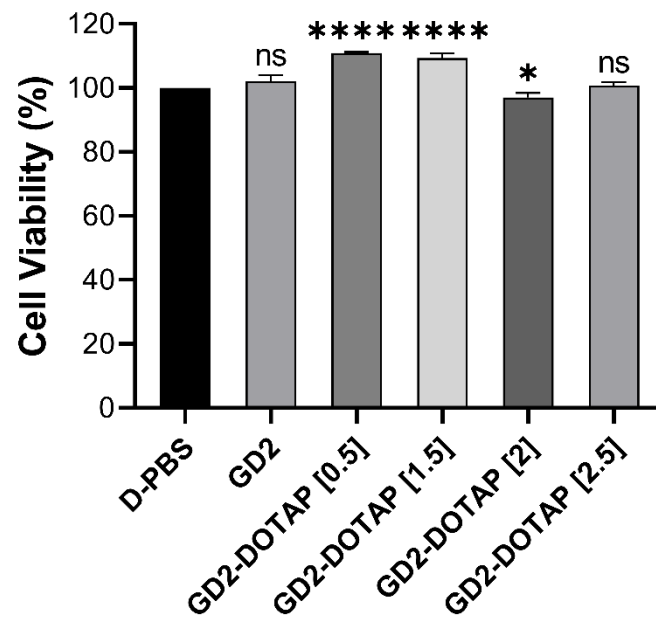

**Figure S7.** Cell viability of human PMBCs after stimulation with 0.5  $\mu$ M Naked GD2 and GD2-DOTAP for 48 h. Data are presented as mean  $\pm$  SD ( $n=5$ ). Statistical significance was calculated compared to non-treated cells (D-PBS). \*\*\*\* $p<0.0001$ , \* $p<0.05$ , ns (not significantly different)  $p>0.05$  (one-way analysis of variance, followed by Tukey's multiple comparisons test).



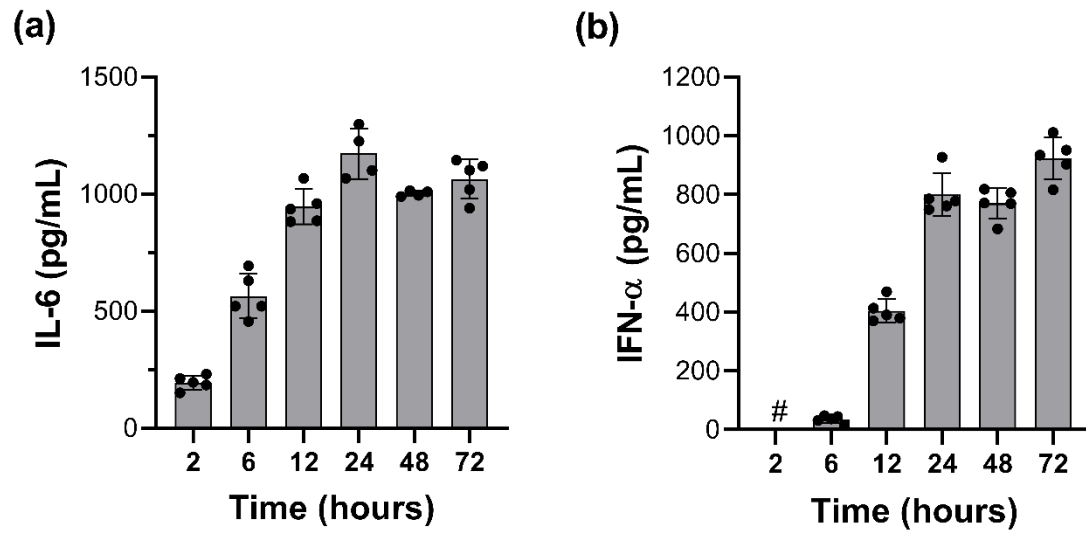

**Figure S8.** Cytokine induction by the GD2-DOTAP complex at a charge ratio of 1.5 in human PBMCs at different stimulation times. The final ODN concentration in the cell medium was 0.5  $\mu$ M. Data are represented as mean  $\pm$  SD ( $n=5$ ). #, lower than the detection limit (3.9 pg/mL).

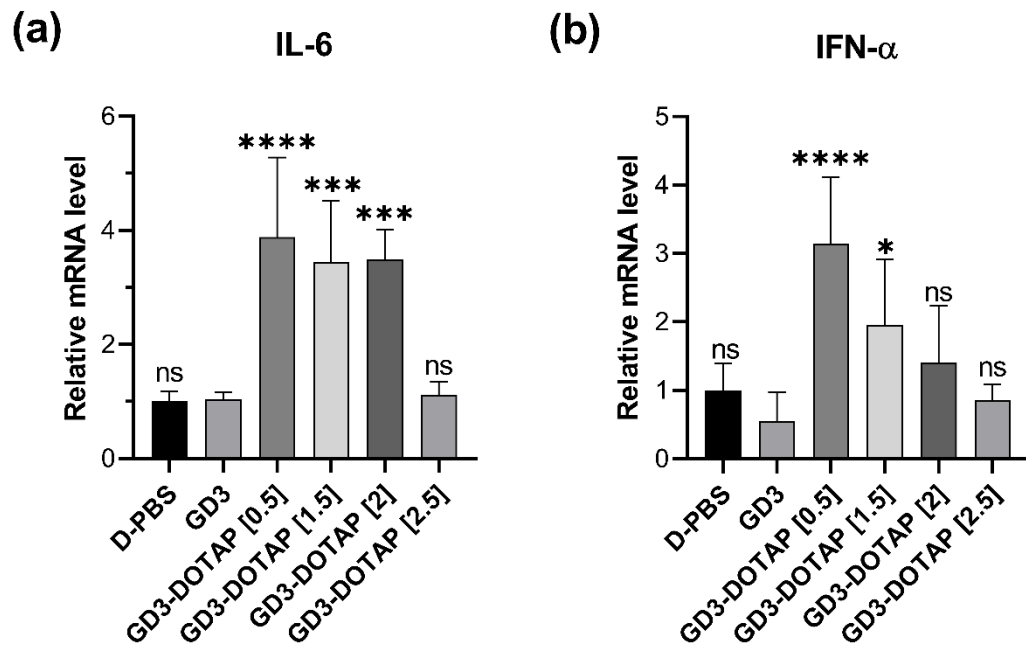

**Figure S9.** Cytokine induction by GD3-DOTAP complexes in (a) Namalwa and (b) PMDC05 cells. Relative mRNA levels of IL-6 and IFN- $\alpha$  in cells were examined after 6 h (in PMDC05 cells) and 4 h (in Namalwa cells) of stimulation with naked GD3 and GD3-DOTAP. The final ODNs concentration in the cell medium was 1  $\mu$ M. Data are represented as mean  $\pm$  SD ( $n=5$ ). Statistical significance was calculated in comparison to bare GD3-treated cells (D-PBS). \*\*\*\* $p<0.0001$ , \*\*\* $p<0.001$ , \* $p<0.05$ , ns (not significantly different)  $p>0.05$  (one-way analysis of variance, followed by Tukey's multiple comparisons test).

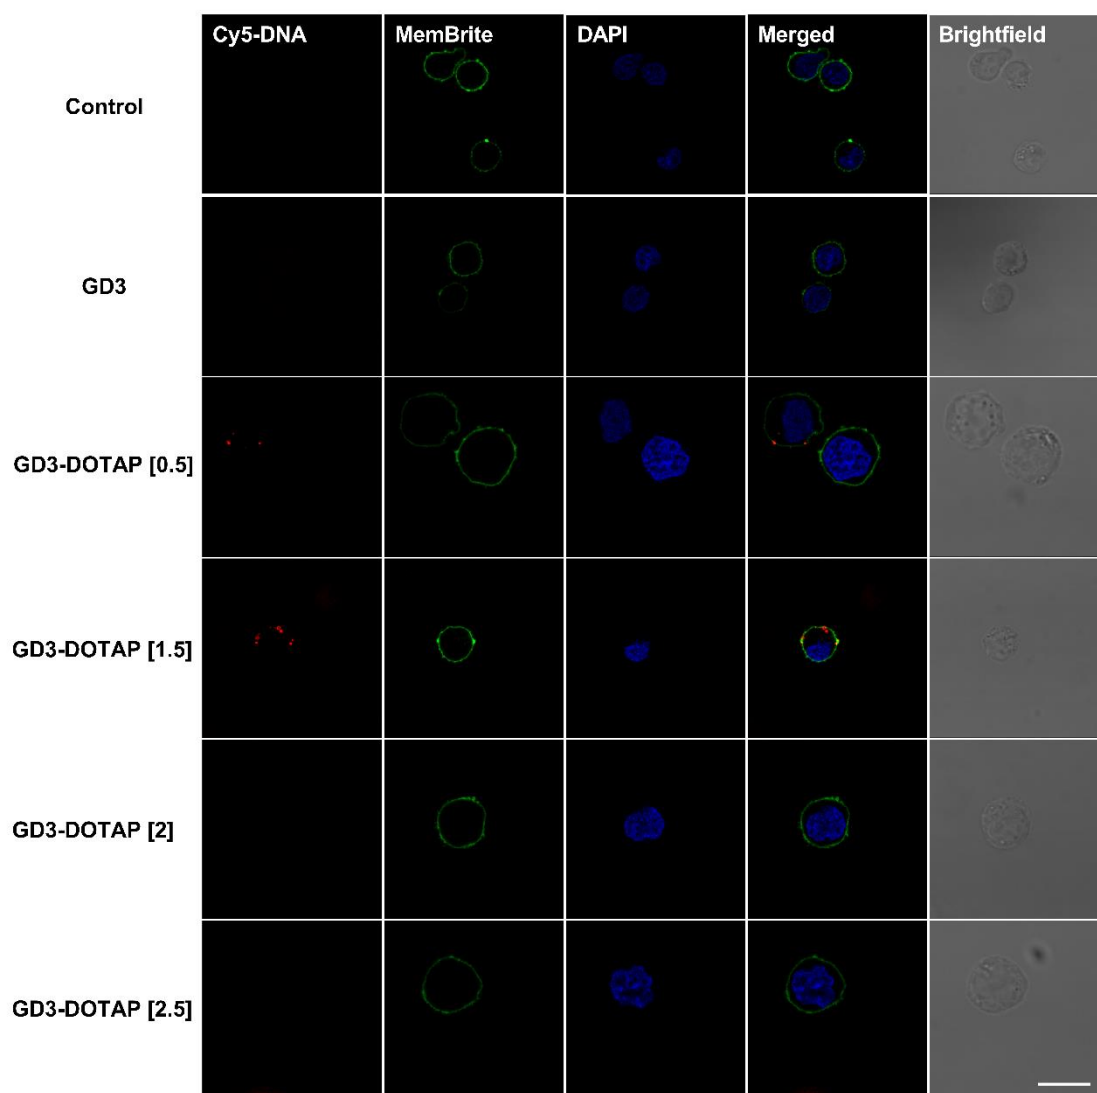

**Figure S10.** Internalization of naked GD3 and GD3-DOTAP complexes in Namalwa cells, after 2 h of stimulation. Non-treated cells served as the control. Cy5 (red), MemBrite™ (green), and DAPI (blue) represent GD3-DOTAP, cell membrane, and nuclei, respectively. Scale bar: 10  $\mu$ m.

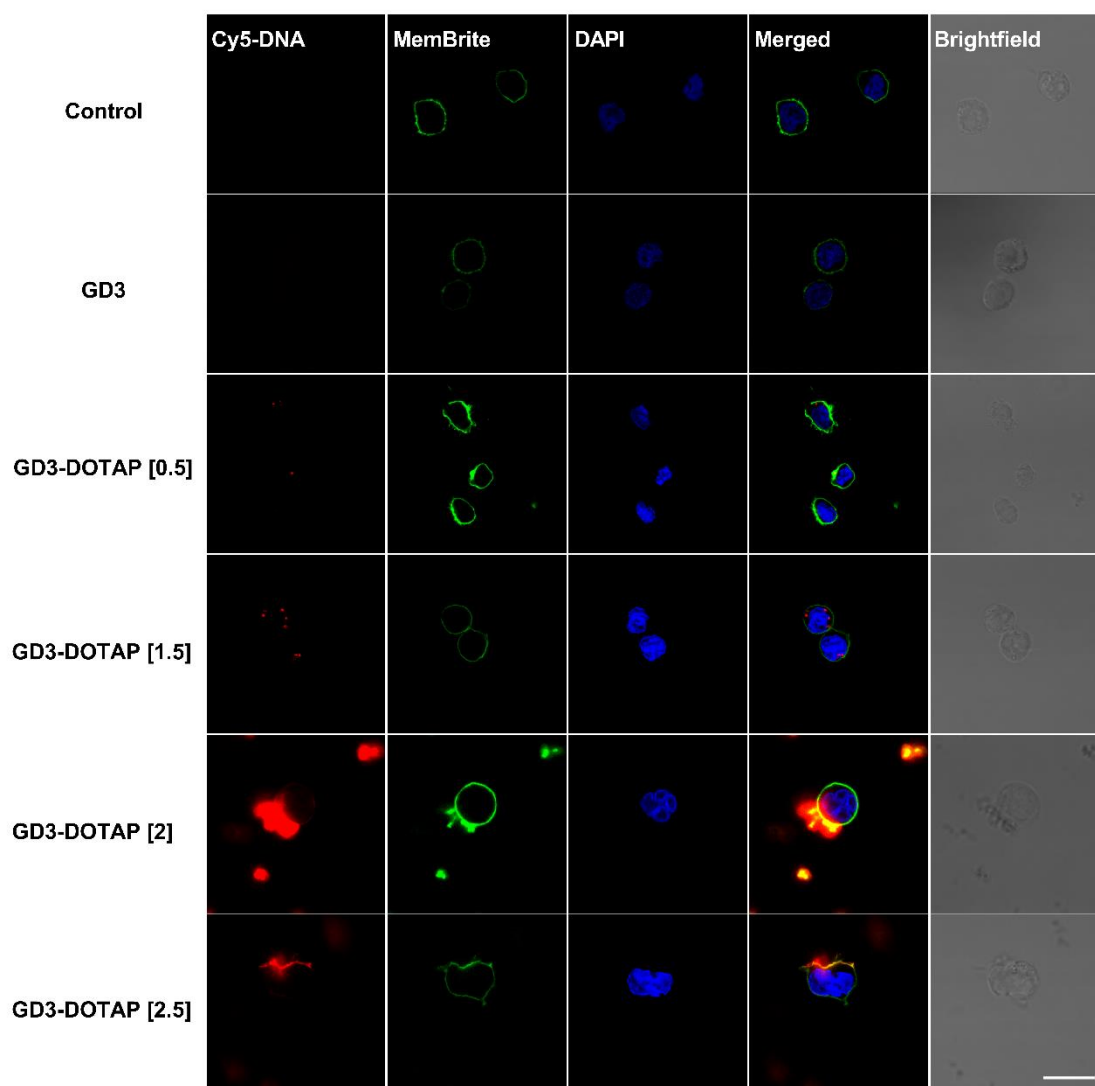

**Figure S11.** Internalization of naked GD3 and GD3-DOTAP complexes in PMDC05 cells, after 2 h of stimulation. The low-charge ratio complexes were localized inside the cells, while high-charge ratio complexes were still bound to the cell membrane. Non-treated cells served as the controls. Cy5 (red), MemBrite™ (green), and DAPI (blue) represent GD3-DOTAP, cell membrane, and nuclei, respectively. Scale bar: 10  $\mu$ m.

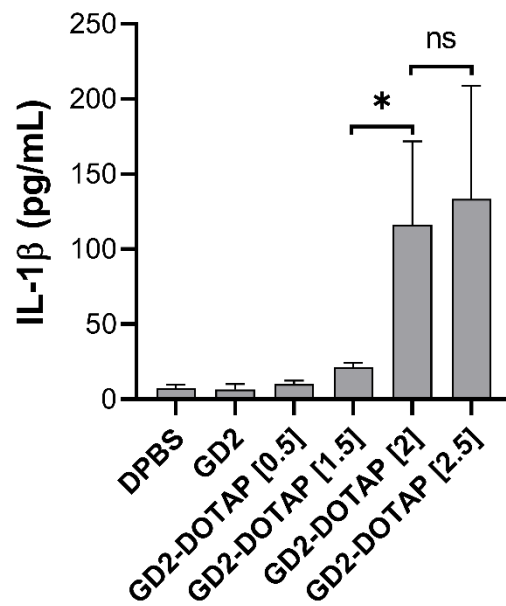

**Figure S12.** IL-1 $\beta$  production by GD2-DOTAP complexes in human PMBCs. The complexes at high-charge ratios (2 and 2.5) significantly induced IL-1 $\beta$ , which triggers the induction of pro-inflammatory cytokines, including IL-6. Data are represented as mean  $\pm$  SD ( $n=5$ ). \* $p<0.05$ , ns (not significantly different)  $p>0.05$  (one-way analysis of variance, followed by Tukey's multiple comparisons test).
